# Supplementary material
Source: HighWire-hosted journal article supplement (https://www.jneurosci.org/highwire/filestream/599770/field_highwire_adjunct_files/2/Figure_S3.pdf)
Supplement: Figure_S3.pdf [file Figure_S3.pdf]

### Supplemental Fig. 3.

**A**

Peak of the respiration phase-locked responses  
(Contra-OE stim. with odor)

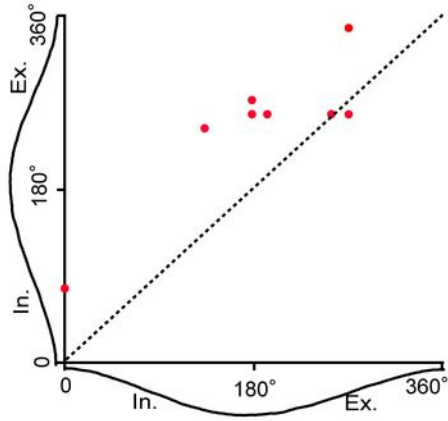

Peak of the respiration phase-locked responses  
(Ipsi-OE stim. with odor)

**B**

Peak of the respiration phase-locked responses  
after nostril obstruction

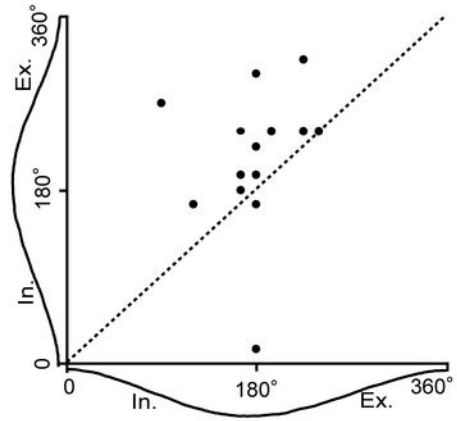

Peak of the respiration phase-locked responses  
before nostril obstruction
